## Does Magnesium Sulfate Alter the Maternal Cardiovascular Response to Vasopressor Agents in Gravid Ewes?

Susan L. Sipes, M.D.,\* David H. Chestnut, M.D.,† Robert D. Vincent, Jr., M.D.‡,  
Carl P. Weiner, M.D.,§ Chris S. Thompson,¶ Papri Chatterjee, M.S.¶

Magnesium sulfate ( $\text{MgSO}_4$ ) attenuates the maternal compensatory response to hemorrhage in gravid ewes, perhaps by decreasing the response to endogenous vasopressors. The purpose of this study was to determine whether  $\text{MgSO}_4$  alters the cardiovascular response of gravid ewes to vasopressor agents. Sixteen gravid ewes underwent a series of experiments consisting of administration of two exogenous and two endogenous vasopressors, each with and without a concurrent  $\text{MgSO}_4$  infusion. Dose-response curves were constructed for phenylephrine (an  $\alpha_1$ -adrenergic agonist), ST-91 (an  $\alpha_2$ -adrenergic agonist), angiotensin II, and arginine vasopressin (AVP).  $\text{MgSO}_4$  significantly attenuated the increase in maternal mean arterial pressure and systemic vascular resistance and the decrease in cardiac output during ST-91 infusion but not during phenylephrine, angiotensin II, or AVP infusions.  $\text{MgSO}_4$  significantly attenuated the increase in uterine vascular resistance during phenylephrine, ST-91, and angiotensin II infusions and the decrease in uterine blood flow during phenylephrine and angiotensin II infusions.  $\text{MgSO}_4$  also appeared to attenuate the decrease in uterine blood flow during ST-91 infusion ( $P = 0.067$ ). The present study suggests that  $\text{MgSO}_4$  antagonizes the effects of  $\alpha_1$ -adrenergic agonists,  $\alpha_2$ -adrenergic agonists, and angiotensin II on the uterine vasculature, thus providing a level of protection for the fetus in situations of maternal stress. (Key words:  $\alpha$ -adrenergic agonists: phenylephrine; ST-91. Anesthesia: obstetric. Electrolytes, ions: magnesium. Pharmacology: angiotensin II. Pregnancy: hypertension; preterm labor. Tocolytic agents: Magnesium sulfate. Vasopressin.)

OBSTETRICIANS give magnesium sulfate ( $\text{MgSO}_4$ ) to preeclamptic women for seizure prophylaxis. In many centers,  $\text{MgSO}_4$  is also the tocolytic agent of choice, especially in women at increased risk for hemorrhage.<sup>1</sup> However, Chestnut *et al.*<sup>2</sup> observed that  $\text{MgSO}_4$  worsened maternal hypotension during hemorrhage in gravid ewes. Subsequently, they reported<sup>3</sup> that indomethacin did not

attenuate the hypotensive response to  $\text{MgSO}_4$  infusion and hemorrhage, suggesting that cyclooxygenase products were not responsible for the worsening of maternal hypotension. Vincent *et al.*<sup>4</sup> observed that  $\text{MgSO}_4$  decreased maternal blood pressure but not uterine blood flow (UBF) during epidural anesthesia in gravid ewes.

Hemorrhage results in increased concentrations of catecholamines, angiotensin II, and vasopressin.<sup>5-9</sup> Each helps to maintain perfusion of vital organs. Lee *et al.*<sup>10</sup> noted that  $\text{MgSO}_4$  decreased the hypertensive response to angiotensin II and norepinephrine (NE) in a dose-dependent fashion in gravid rabbits. We speculated that  $\text{MgSO}_4$  attenuates the maternal compensatory response to hemorrhage or sympathectomy by decreasing the maternal response to endogenous vasopressors. The purpose of the present study was to determine whether  $\text{MgSO}_4$  alters the maternal cardiovascular response to vasopressor agents in gravid ewes.

### Materials and Methods

#### MATERNAL/FETAL INSTRUMENTATION AND POSTSURGICAL CARE

The protocol was approved by the University of Iowa Animal Care Committee. Mixed breed ewes were obtained from a commercial breeder at approximately 118 days of timed gestation (term = 145 days). Each animal was fasted for 36 h before surgery. At 120 days of gestation, induction of general anesthesia was accomplished with sodium thiopental (8–12 mg/kg). After tracheal intubation anesthesia was maintained with 50% nitrous oxide, 50% oxygen, and 1–1.5% halothane. Mechanical ventilation was maintained throughout surgery. Using sterile technique, a laparotomy and hysterotomy were performed, and catheters (polyethylene-90) were inserted into the fetal descending aorta *via* each femoral artery. Fenestrated high pressure tubing (MX 566, Medex, Hilliard, OH) was secured to the fetal hind limb to monitor intraamniotic pressure. After the hysterotomy and laparotomy incisions were closed, a left paramedian incision was made. The left uterine artery was isolated *via* a retroperitoneal approach, and an electromagnetic flow probe (Dienko, Los Angeles, CA) was placed around the artery. Catheters (polyethylene-240) were then inserted into the maternal descending aorta and inferior vena cava *via* the left mammary artery and vein, respectively. All catheters

\* Associate, Department of Obstetrics and Gynecology.

† Professor, Departments of Anesthesia and Obstetrics and Gynecology.

‡ Assistant Professor, Department of Anesthesia.

§ Professor, Department of Obstetrics and Gynecology.

¶ Research Assistant, Department of Anesthesia.

Received from the Obstetric Anesthesia Research Laboratory, Departments of Anesthesia and Obstetrics and Gynecology, University of Iowa College of Medicine, Iowa City, Iowa. Accepted for publication July 24, 1991. Supported in part by National Institutes of Health grant GM 40917. Presented in part at the Annual Meeting of the Society for Obstetric Anesthesia and Perinatology, Madison, Wisconsin, May 26, 1990, and at the Annual Meeting of the American Society of Anesthesiologists, Las Vegas, Nevada, October 23, 1990.

Reprints will not be available.

Address correspondence to Dr. Sipes: Division of Maternal-Fetal Medicine, Department of Obstetrics and Gynecology, University of Iowa Hospitals and Clinics, 200 Hawkins Drive, Iowa City, Iowa 52242.

were tunneled subcutaneously and exteriorized through a small incision in the left flank. Finally, an 8.5-Fr introducer (AK09800, Arrow, Reading, PA) was placed percutaneously into the right jugular vein.

After surgery, each animal was kept in an approved cage in a restricted area, fed a balanced diet, and allowed a recovery period of at least four days. Procaine and benzathine penicillin G (Dual-Pen®, Tech America, Kansas City, MO) 600,000 U or procaine penicillin G 300,000 U and dihydrostreptomycin 375 mg (Distracyllin®, Solray Veterinary, Princeton, NJ) were given to the mother intramuscularly before surgery and daily for 3 days after surgery. Gentamicin 80 mg was given to the mother intravenously during surgery and after the experiment each day, and gentamicin 40 mg was given *via* the amniotic catheter during surgery and after the experiment each day. Nalbuphine hydrochloride 5 mg was given as needed for postoperative analgesia on the day of surgery.

#### EXPERIMENTAL MEASUREMENTS AND DATA ACQUISITION

Each experiment was performed with the animal standing, supported by a canvas sling, within an approved transport cart. The canvas sling allowed the animals to remain upright at all times.

Before the first experiment in each animal, a pulmonary artery catheter (93A-131H-7F or 93A-831H-7.5F, American Edwards Laboratories, Santa Ana, CA) was inserted through the jugular vein introducer. At the end of each experiment, the catheter was withdrawn into the superior vena cava. Sterility was maintained with an 80-cm sheath. Maternal arterial blood pressure, central venous pressure, pulmonary artery pressure, and fetal arterial blood pressure were measured continuously *via* disposable strain gauge pressure transducers (46951-02, Abbott Critical Care Systems, North Chicago, IL) and transducer couplers (572-25, Coulbourn Instruments, Lehigh Valley, PA). Fetal pressures were corrected by subtraction of simultaneous intraamniotic pressure. Mean arterial blood pressure was computed arithmetically. The maternal and fetal heart rates were computed from the arterial waveforms. UBF was measured continuously with a quantitative electromagnetic flowmeter (RF-2500, Dienco). Arterial and venous pressures, heart rates, and UBF were recorded at 10-s intervals using a computer-based system and customized data acquisition software (Alternatives Unlimited, Des Moines, IA).

Cardiac output measurements were made in triplicate with 10 ml iced saline and a thermodilution cardiac output computer (9520A, Edwards Laboratories). Maternal and fetal arterial blood gas and pH values were determined using an Instrumentation Laboratory (1302, Leighton, MA) blood gas analyzer. All values were corrected for

temperature (39.5° C). Serum magnesium concentrations were measured using a spectrophotometric technique (Lancer Magnesium Rapid Stat Diagnostic Kit, Sherwood Medical, St. Louis, MO).

#### EXPERIMENTAL PROTOCOL

Four vasopressors were chosen for these experiments: phenylephrine (an  $\alpha_1$ -adrenergic agonist), ST-91 (an  $\alpha_2$ -adrenergic agonist), angiotensin II, and arginine vasopressin (AVP).

The experimental sequence included the following:

1. One hour for initial baseline measurements.
2. Time zero: intravenous administration of  $\text{MgSO}_4$  4 g or normal saline over 5 min. The total volume of crystalloid was 50 ml in each group.
3. At 5 min, intravenous infusion of  $\text{MgSO}_4$  4 g/h or normal saline for the duration of the experiment. The total rate of crystalloid infusion was 100 ml/h in each group.
4. At 90 min, the initial vasopressor dose was given intravenously over 5 min.
5. The second, third, fourth, and fifth doses of each vasopressor were given 40 min after the preceding dose. (Because of the longer half-life of ST-91, 4 h separated each dose of ST-91 in order to allow maternal cardiovascular measurements to return to baseline. Each animal received only two active doses of ST-91 each day.)

The infusion rates of each vasopressor were as follows:

- 1) phenylephrine: 0, 1, 2, 4, and  $8 \mu\text{g} \cdot \text{kg}^{-1} \cdot \text{min}^{-1}$ ; 2) ST-91: 0, 1, 2, 4, and  $8 \mu\text{g} \cdot \text{kg}^{-1} \cdot \text{min}^{-1}$ ; 3) angiotensin II: 0, 0.01, 0.02, 0.04, and  $0.08 \mu\text{g} \cdot \text{kg}^{-1} \cdot \text{min}^{-1}$ ; and 4) AVP: 0, 0.002, 0.004, 0.008, and  $0.016 \mu\text{g} \cdot \text{kg}^{-1} \cdot \text{min}^{-1}$ .

There were four groups of experiments: 1) phenylephrine, with and without  $\text{MgSO}_4$  ( $n = 8$ ); 2) ST-91, with and without  $\text{MgSO}_4$  ( $n = 8$ ); 3) angiotensin II, with and without  $\text{MgSO}_4$  ( $n = 8$ ); and AVP, with and without  $\text{MgSO}_4$  ( $n = 8$ ). We used a total of 16 animals for these experiments. Only one set of vasopressor doses (either with or without  $\text{MgSO}_4$ ) was given per day, and each animal rested at least overnight before undergoing the alternate experiment. (Each complete set of ST-91 doses [with or without  $\text{MgSO}_4$ ] required 2 days to complete.) Experiments were performed and doses given in random order.

Dose-response curves were constructed using hemodynamic measurements obtained during the last 2 min of the 5-min vasopressor infusion. Each measurement represents the mean of 12 observations made at 10-s intervals over the 2-min measurement period. Baseline measurements for each individual vasopressor dose were defined as the mean of 12 measurements obtained over 2 min just before infusion of that dose of vasopressor. Blood gas

TABLE 1. Initial Baseline Maternal and Fetal Hemodynamic, Blood Gas, and Acid-Base Measurements

|                                                                | Phenylephrine     |              | ST-91             |               | Angiotensin II    |             | Vasopressin       |              |
|----------------------------------------------------------------|-------------------|--------------|-------------------|---------------|-------------------|-------------|-------------------|--------------|
|                                                                | MgSO <sub>4</sub> | Control      | MgSO <sub>4</sub> | Control       | MgSO <sub>4</sub> | Control     | MgSO <sub>4</sub> | Control      |
| Maternal                                                       |                   |              |                   |               |                   |             |                   |              |
| Heart rate (beats per min)                                     | 125 ± 3           | 129 ± 3      | 111 ± 4           | 113 ± 4       | 120 ± 3           | 117 ± 3     | 118 ± 4           | 114 ± 4      |
| Mean arterial pressure (mmHg)                                  | 95 ± 3            | 95 ± 3       | 89 ± 4            | 88 ± 4        | 94 ± 2            | 94 ± 2      | 92 ± 1            | 90 ± 1       |
| Cardiac output (l/min)                                         | 9.2 ± 0.4         | 9.7 ± 0.4    | 10.2 ± 0.4        | 9.9 ± 0.4     | 9.4 ± 0.3         | 10.0 ± 0.3  | 8.7 ± 0.3         | 8.9 ± 0.3    |
| Systemic vascular resistance<br>(dyne · s · cm <sup>-5</sup> ) | 940 ± 88          | 749 ± 88     | 661 ± 97          | 700 ± 97      | 719 ± 35          | 725 ± 38    | 814 ± 50          | 777 ± 53     |
| Uterine blood flow (ml/min)                                    | 630 ± 57          | 543 ± 49     | 589 ± 43          | 532 ± 43      | 700 ± 40          | 656 ± 37    | 558 ± 39          | 562 ± 39     |
| Uterine vascular resistance<br>(dyne · s · cm <sup>-5</sup> )  | 15493 ± 6323      | 16946 ± 5476 | 10970 ± 12998     | 13173 ± 12998 | 10757 ± 868       | 12036 ± 868 | 13349 ± 1170      | 11653 ± 1308 |
| pH                                                             | 7.44 ± 0.01       | 7.45 ± 0.01  | 7.42 ± 0.01       | 7.46 ± 0.01   | 7.45 ± 0.01       | 7.43 ± 0.01 | 7.45 ± 0.01       | 7.44 ± 0.01  |
| P <sub>O<sub>2</sub></sub> (mmHg)                              | 108 ± 3           | 112 ± 3      | 111 ± 5           | 104 ± 5       | 113 ± 2           | 109 ± 2     | 113 ± 2           | 114 ± 2      |
| P <sub>CO<sub>2</sub></sub> (mmHg)                             | 38 ± 1            | 38 ± 1       | 36 ± 1            | 38 ± 1        | 37 ± 1            | 38 ± 1      | 38 ± 1            | 37 ± 1       |
| Fetal                                                          |                   |              |                   |               |                   |             |                   |              |
| Heart rate (beats per min)                                     | 161 ± 6           | 164 ± 6      | 177 ± 5           | 178 ± 6       | 170 ± 4           | 167 ± 4     | 172 ± 4           | 165 ± 4      |
| pH                                                             | 7.33 ± 0.01       | 7.32 ± 0.01  | 7.34 ± 0.01       | 7.35 ± 0.01   | 7.30 ± 0.01       | 7.32 ± 0.01 | 7.30 ± 0.01       | 7.30 ± 0.01  |
| P <sub>O<sub>2</sub></sub> (mmHg)                              | 20 ± 1            | 20 ± 1       | 21 ± 1            | 22 ± 1        | 20 ± 1.5          | 19 ± 1      | 19 ± 1            | 19 ± 1       |
| P <sub>CO<sub>2</sub></sub> (mmHg)                             | 50 ± 1            | 50 ± 1       | 48 ± 1            | 49 ± 1        | 50 ± 1            | 50 ± 1      | 48 ± 1            | 50 ± 1       |

All values are mean ± SEM.  
There were no significant differences between the MgSO<sub>4</sub> and control groups for any of the measurements in the four sets of experiments.

and acid-base measurements were obtained 5 min after the completion of the vasopressor infusion.

Initial baseline hemodynamic measurements, and all blood gas and acid-base measurements and  $\text{MgSO}_4$  concentrations are reported as mean ( $\pm$  standard error of the mean). Hemodynamic changes are presented as mean ( $\pm$  standard error of the mean) percent of baseline for that dose of vasopressor. Statistical analysis was performed by repeated-measures analysis of variance for overall differences between the dose-response curves with and without  $\text{MgSO}_4$ . Linear regression analyses were performed for each hemodynamic variable *versus* dose to determine the presence of dose-dependency.  $P < 0.05$  was considered significant.

## Results

The mean ( $\pm$  standard error of the mean) weight of the animals was  $58 \pm 2$  kg. Initial baseline maternal and fetal hemodynamic, acid-base, and blood gas measurements were similar before  $\text{MgSO}_4$  and control (normal saline) experiments for each of the four vasopressor groups (table 1). No values had changed significantly at 90 min after starting the infusion of  $\text{MgSO}_4$  or normal saline-control (data not shown). Mean serum magnesium concentrations at time zero, at 90 min, and before the final vasopressor dose for each experiment day are listed in table 2. (These concentrations were within the therapeutic range for pregnant women.<sup>11,12</sup>)

Each of the four vasopressors tested produced a dose-dependent increase in maternal mean arterial blood pressure and systemic vascular resistance and a dose-dependent decrease in cardiac output (figs. 1–3). All vasopressors decreased UBF (fig. 4), but the decrease was dose-dependent only during infusion of phenylephrine and ST-91. All vasopressors increased uterine vascular resistance (UVR) (fig. 5). The increase in UVR was dose-dependent for all vasopressors except AVP.  $\text{MgSO}_4$  significantly attenuated the increase in mean arterial blood pressure ( $P = 0.01$ ) and systemic vascular resistance ( $P = 0.002$ ) and the decrease in cardiac output ( $P = 0.003$ ) during ST-91 infusion, but not during phenylephrine, angiotensin II, or AVP infusions (figs. 1–3).

$\text{MgSO}_4$  significantly attenuated the decrease in UBF due to phenylephrine ( $P = 0.004$ ) and angiotensin II ( $P = 0.0001$ ) but had no effect on UBF during AVP infusion (fig. 4). There was a trend toward attenuation of the ST-91-induced decrease in UBF during  $\text{MgSO}_4$  infusion ( $P < 0.07$ ).  $\text{MgSO}_4$  significantly attenuated the increase in UVR in response to phenylephrine, ST-91, and angiotensin II but not AVP infusion (fig. 5).

Maternal pH decreased significantly from baseline only in the ST-91  $\text{MgSO}_4$  group (from  $7.46 \pm 0.01$  to  $7.41 \pm 0.01$ ,  $P = 0.04$ ) and the ST-91 control group (from

$7.43 \pm 0.01$  to  $7.39 \pm 0.01$ ,  $P = 0.007$ ). The decreases observed for the two groups were not significantly different from each other. Fetal arterial pH decreased significantly (from  $7.32 \pm 0.01$  to  $7.28 \pm 0.01$  in the  $\text{MgSO}_4$  group and from  $7.35 \pm 0.01$  to  $7.29 \pm 0.01$  in the control group) during ST-91 infusion only. Fetal arterial carbon dioxide tension also increased significantly (from  $52 \pm 1$  to  $56 \pm 1$  mmHg in the  $\text{MgSO}_4$  group and from  $50 \pm 1$  to  $55 \pm 1$  mmHg in the control group) during ST-91 infusion only. These changes did not significantly differ between the  $\text{MgSO}_4$  and control groups. Maternal arterial carbon dioxide tension and oxygen tension and fetal arterial oxygen tension did not change significantly during any vasopressor infusion, with or without  $\text{MgSO}_4$ .

## Discussion

Magnesium has several known effects on vascular smooth muscle cells and neurotransmitter release that may explain the observed attenuation of specific vasopressor effects during  $\text{MgSO}_4$  infusion. First, magnesium interferes with multiple cellular mechanisms involving calcium binding and transport. In smooth muscle cells, magnesium blocks transmembranous influx of calcium across calcium channels, competes intracellularly with calcium at non-specific binding sites on troponin-C and myosin, and inhibits calcium release from the sarcoplasmic reticulum.<sup>13–16</sup> Second, magnesium interferes with neurotransmitter release at the adrenergic nerve terminal. *In vitro* magnesium facilitates NE uptake into nerve granules while inhibiting its release.<sup>17</sup> In contrast, calcium enhances NE release from these granules.<sup>17</sup> The work of Weaver *et al.*<sup>18</sup> supports the premise that  $\text{MgSO}_4$  alters NE reuptake at adrenergic nerve endings. These authors reported that

TABLE 2. Serum Magnesium Concentrations (mg/dl)

|                 | Baseline      | 90 Min          | Before Final Vasopressor Dose for the Day |
|-----------------|---------------|-----------------|-------------------------------------------|
| Phenylephrine   |               |                 |                                           |
| $\text{MgSO}_4$ | $2.3 \pm 0.2$ | $5.8 \pm 0.2^*$ | $6.0 \pm 0.2^*$                           |
| Control         | $2.2 \pm 0.2$ | $2.3 \pm 0.2$   | $2.2 \pm 0.2$                             |
| ST-91           |               |                 |                                           |
| $\text{MgSO}_4$ | $2.2 \pm 0.1$ | $6.4 \pm 0.1^*$ | $7.7 \pm 0.1^\dagger$                     |
| Control         | $2.2 \pm 0.1$ | $2.4 \pm 0.1$   | $2.4 \pm 0.1$                             |
| Angiotensin II  |               |                 |                                           |
| $\text{MgSO}_4$ | $2.2 \pm 0.2$ | $5.4 \pm 0.2^*$ | $5.9 \pm 0.2^\dagger$                     |
| Control         | $2.2 \pm 0.2$ | $2.0 \pm 0.2$   | $2.1 \pm 0.2$                             |
| Vasopressin     |               |                 |                                           |
| $\text{MgSO}_4$ | $2.1 \pm 0.2$ | $5.7 \pm 0.2^*$ | $5.8 \pm 0.2^*$                           |
| Control         | $2.2 \pm 0.2$ | $2.3 \pm 0.2$   | $2.1 \pm 0.2$                             |

Values are reported as mean  $\pm$  SEM.

\* Significantly different from baseline only.

† Significantly different from both the baseline and the 90-min values.

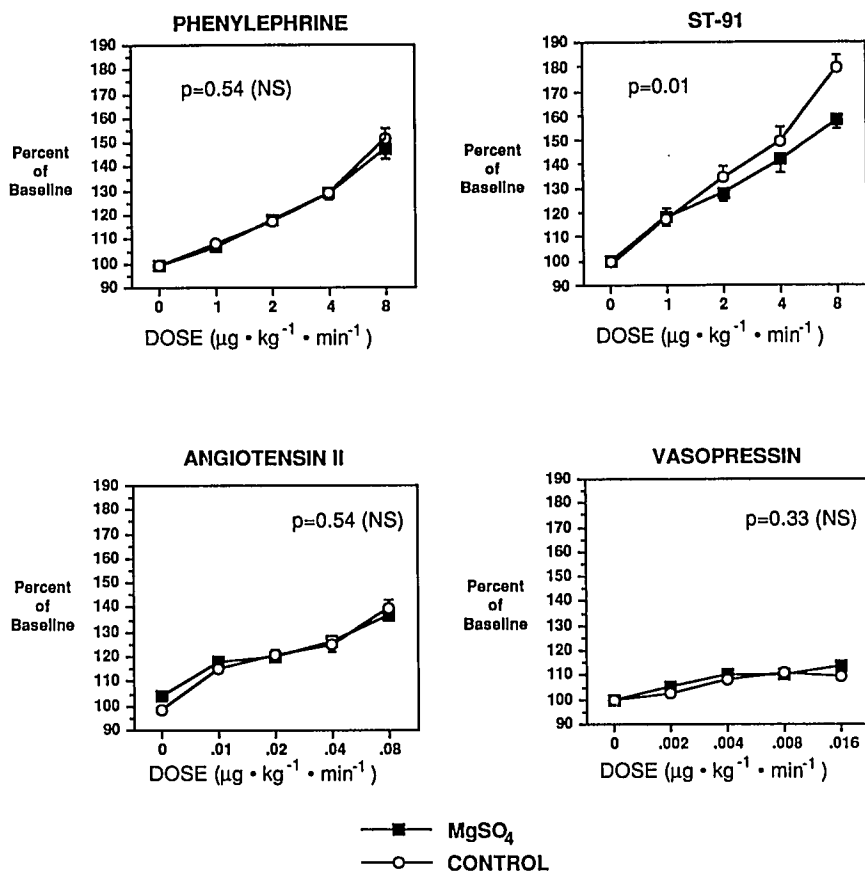

FIG. 1. Maternal mean arterial pressure dose-response curves for each vasopressor, with and without MgSO<sub>4</sub>. Each response is expressed as mean ( $\pm$ SEM) percent of the baseline for that dose of vasopressor. Standard error bars, if not shown, are included within the height of the squares or circles for each data point. *P* values are reported for the overall difference between the MgSO<sub>4</sub> and control groups.

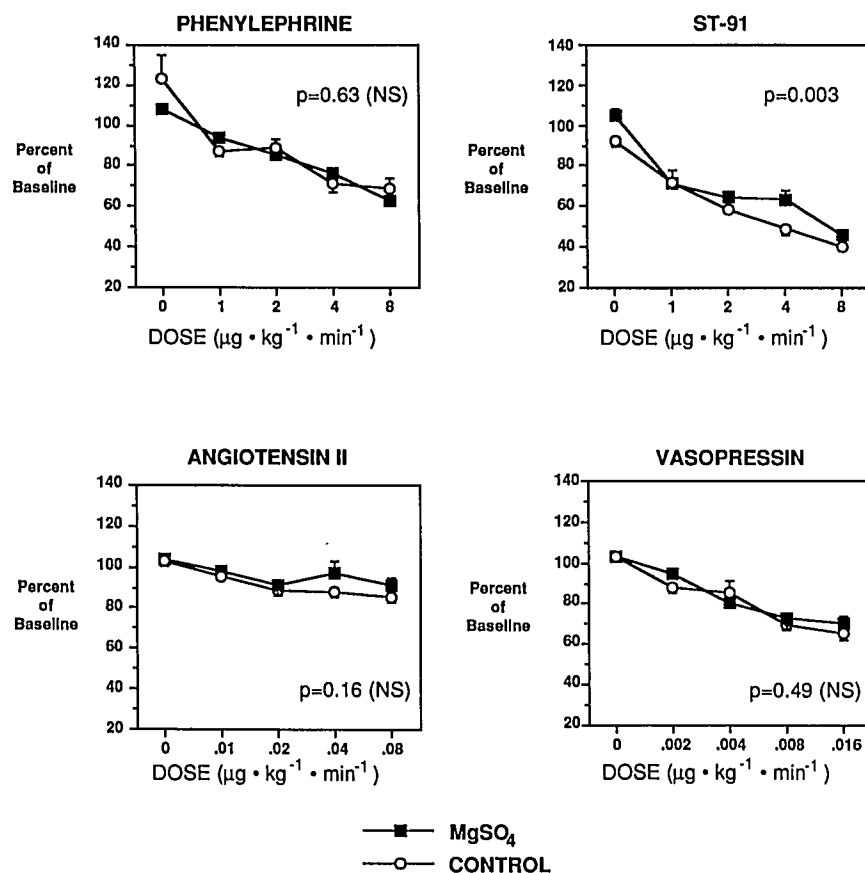

FIG. 2. Maternal cardiac output dose-response curves for each vasopressor, with and without MgSO<sub>4</sub>. Each response is expressed as mean ( $\pm$ SEM) percent of the baseline for that dose of vasopressor. Standard error bars, if not shown, are included within the height of the squares or circles for each data point. *P* values are reported for the overall difference between the MgSO<sub>4</sub> and control groups.

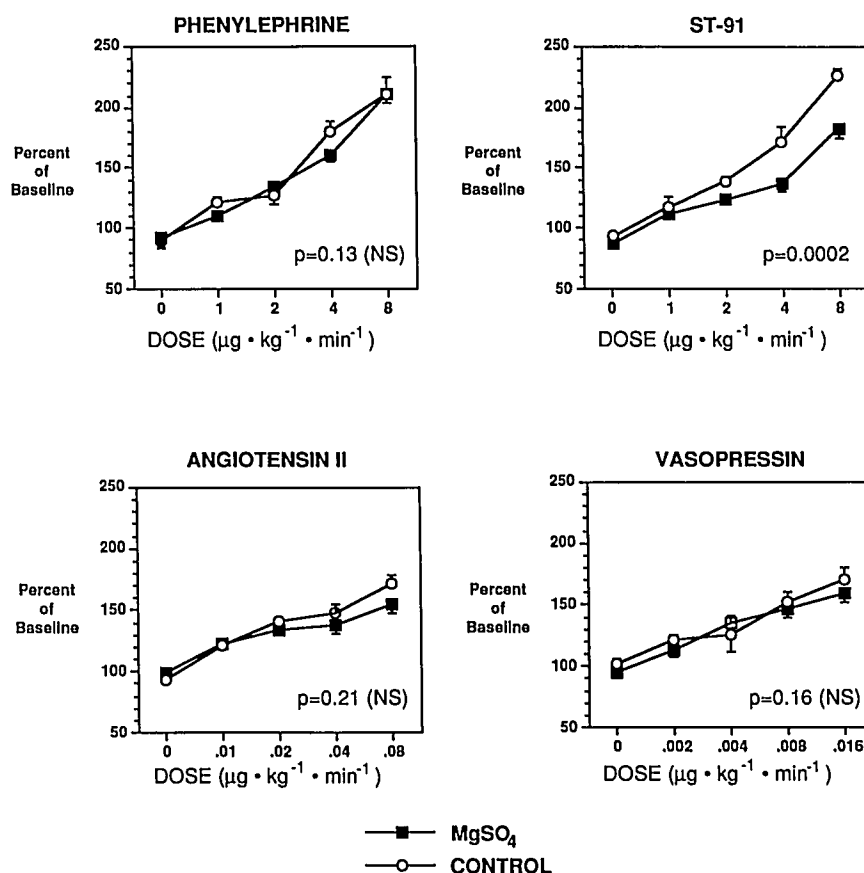

FIG. 3. Maternal systemic vascular resistance dose-response curves for each vasopressor, with and without  $\text{MgSO}_4$ . Each response is expressed as mean ( $\pm$ SEM) percent of the baseline for that dose of vasopressor. Standard error bars, if not shown, are included within the height of the squares or circles for each data point. *P* values are reported for the overall difference between the  $\text{MgSO}_4$  and control groups.

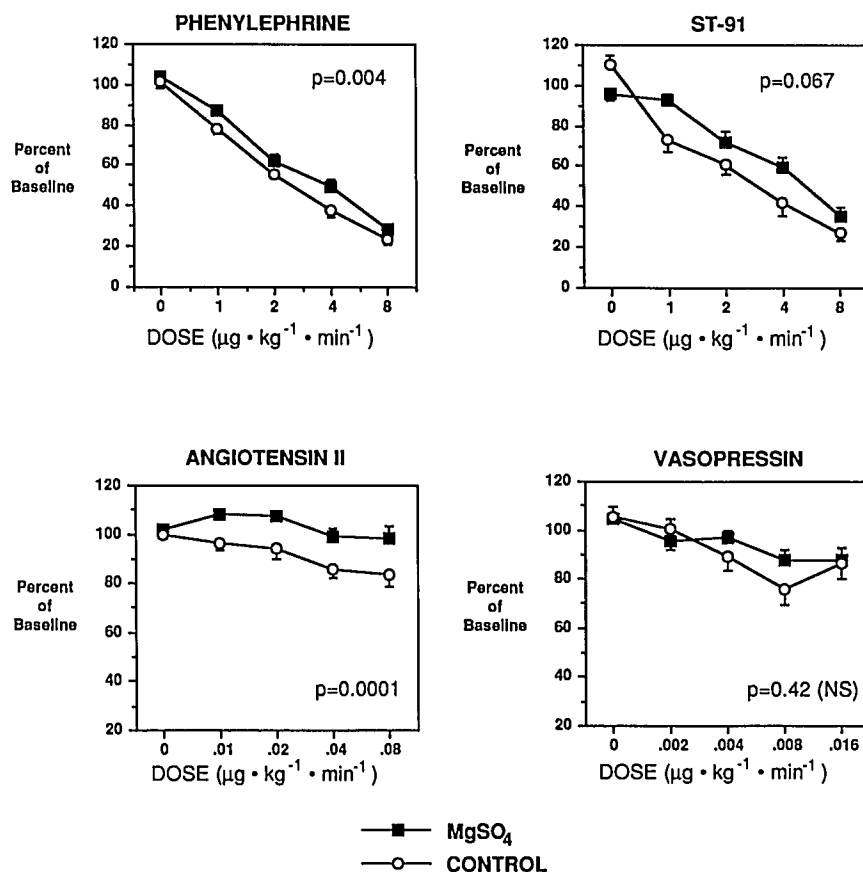

FIG. 4. Uterine blood flow dose-response curves for each vasopressor, with and without  $\text{MgSO}_4$ . Each response is expressed as mean ( $\pm$ SEM) percent of the baseline for that dose of vasopressor. Standard error bars, if not shown, are included within the height of the squares or circles for each data point. *P* values are reported for the overall difference between the  $\text{MgSO}_4$  and control groups.

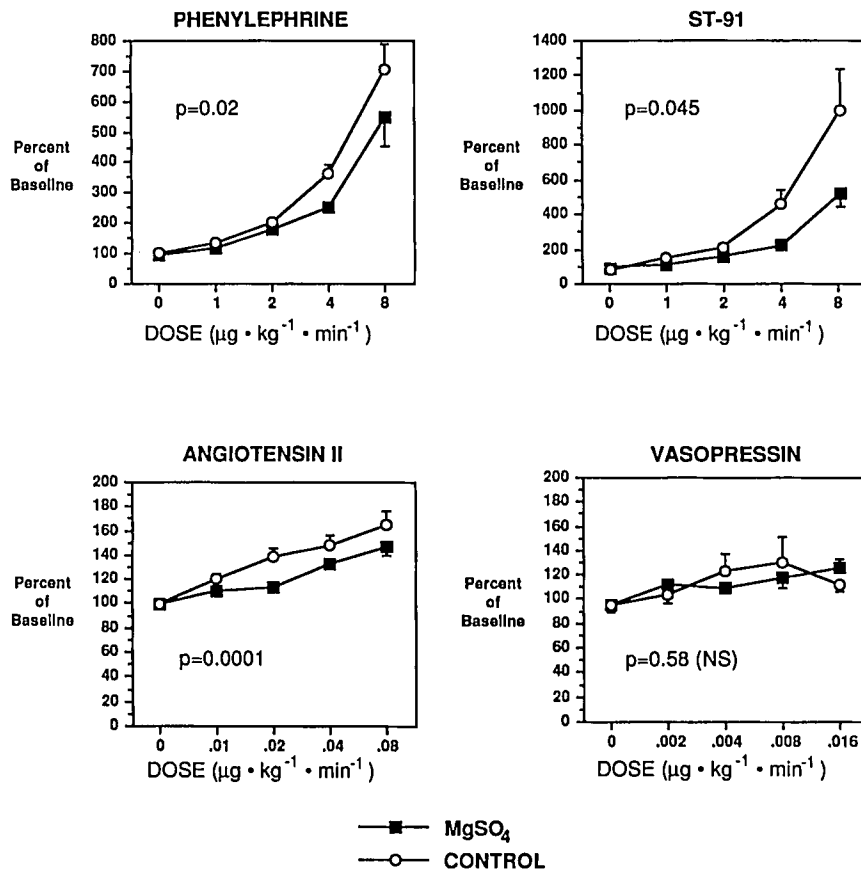

FIG. 5. Uterine vascular resistance dose-response curves for each vasopressor, with and without  $\text{MgSO}_4$ . Each response is expressed as mean ( $\pm$ SEM) percent of the baseline for that dose of vasopressor. Standard error bars, if not shown, are included within the height of the squares or circles for each data point. P values are reported for the overall difference between the  $\text{MgSO}_4$  and control groups.

$\text{MgSO}_4$  reduced the hypertensive response to cocaine in term pregnant sheep.<sup>18</sup> In addition, magnesium inhibits catecholamine release following sympathetic stimulation *in vivo*.<sup>19</sup>

Results of the present study can be better understood through a discussion of  $\alpha_1$ - and  $\alpha_2$ -adrenoceptor actions in the systemic and uterine vasculature. Phenylephrine, a postjunctional  $\alpha_1$ -adrenergic agonist, is a substrate for the same neuronal reuptake mechanism as NE.<sup>20</sup> Phenylephrine's effects at postjunctional  $\alpha_1$ -adrenoceptors are not susceptible to antagonism by calcium-channel blockers.<sup>21</sup>

ST-91 activates  $\alpha_2$ -adrenoceptors located both pre- and postjunctionally in the blood vessel wall. Prejunctional  $\alpha_2$  adrenoceptors inhibit NE release from the neuron into the neuromuscular junction. Activation of postjunctional  $\alpha_2$  adrenoceptors causes vasoconstriction.<sup>22</sup> ST-91 acts predominantly as a vasopressor through activation of these postjunctional  $\alpha_2$  adrenoceptors.<sup>22,23</sup>

Postjunctional  $\alpha_2$ -adrenoceptor stimulation is accompanied by calcium influx across the cell membrane, activating intracellular contractile proteins.<sup>24</sup> Calcium-channel blockers reduce muscle contraction by inhibiting this transmembranous calcium influx.<sup>24,25</sup> In addition,  $\alpha_2$ -adrenoceptors stimulate the release of endothelium-derived

relaxing factor *via* a calcium independent mechanism.<sup>26,27</sup> Thus, calcium-channel blockade by  $\text{MgSO}_4$  may block the effects of postjunctional  $\alpha_2$ -adrenoceptors and allow the vasodilating actions of  $\alpha_2$ -agonists to prevail.<sup>28</sup>

In the present study,  $\text{MgSO}_4$  significantly attenuated the systemic vascular effects of *only* the  $\alpha_2$ -adrenergic agonist ST-91, and it attenuated the uterine vascular effects of *both* the  $\alpha_1$ - and  $\alpha_2$ -adrenergic agonists. Thus, the effect of magnesium on systemic postjunctional  $\alpha_2$ -adrenoceptors appeared to have greater importance than its effects on NE release and reuptake at systemic nerve terminals. In contrast, Lee *et al.*<sup>10</sup> showed that  $\text{MgSO}_4$  blunted the increase in maternal mean arterial blood pressure in response to fixed angiotensin II and NE boluses in a dose-dependent fashion in pregnant rabbits. One potential flaw in the design of that study was the lack of control animals; thus, other confounding factors, such as the fluid volume infused, order of dose administration, and time in the laboratory, could not be separated from the effects of  $\text{MgSO}_4$ . Furthermore,  $\alpha_1$ - and  $\alpha_2$ -adrenoceptor distribution differs according to the vascular bed, vessel size, and/or species that is studied.<sup>22</sup> For example, relative proportions of  $\alpha_1$ - and  $\alpha_2$ -adrenoceptors appear to differ between the uterine and systemic vasculature. Magness and Rosenfeld<sup>29</sup> observed that the uterine vasculature of

gravid ewes was more responsive than was the systemic vasculature to  $\alpha_1$ -adrenergic agonists. Furthermore, during *in vitro* investigations of near-term gravid ewes, uterine artery smooth muscle contraction was primarily mediated by  $\alpha_1$ -adrenoceptors.<sup>30</sup>  $\alpha_2$ -adrenoceptors, though potentially present, were much less important in mediation of uterine artery contraction.<sup>30</sup> In contrast, the present study showed a marked increase in UVR in response to ST-91, suggesting that  $\alpha_2$ -agonists can play a significant role in uterine artery smooth muscle contraction.

The study by Chestnut *et al.*<sup>2</sup> showed that  $\text{MgSO}_4$  worsened the hypotensive response to hemorrhage in gravid ewes. Although we speculated that  $\text{MgSO}_4$  attenuated systemic vascular smooth muscle response to endogenous vasopressors, in the present study this hypothesis was confirmed only with the  $\alpha_2$ -adrenergic agonist ST-91. Of course, the intravenous infusion of individual vasopressor agents does not necessarily mimic the global compensatory response to a cardiovascular stress such as hemorrhage. Not only is there regional variation in the density of adrenergic receptors, but undoubtedly there is variation in the local concentration of endogenous vasopressors at their various sites of action. Further, magnesium may not affect vascular tone solely by direct action. For example,  $\text{MgSO}_4$  may attenuate the endogenous release of catecholamines, angiotensin II, and/or AVP in response to hemorrhage. Cohen and Kitzes<sup>19</sup> observed that  $\text{MgSO}_4$  inhibited catecholamine release in humans. In addition, during epidural anesthesia-induced sympathetic blockade, Peters *et al.*<sup>31</sup> demonstrated that blood pressure is partially maintained by vasopressin release in nonpregnant dogs. Thus, blockade of vasopressin release could be one mechanism by which  $\text{MgSO}_4$  decreases maternal blood pressure during epidural anesthesia and/or hemorrhage.<sup>4,7-9</sup>

Another possible explanation for our findings is that  $\text{MgSO}_4$  attenuates the systemic vascular responses to endogenous vasopressors other than  $\alpha_2$ -adrenergic agonists *only* in the presence of hypotension or hypovolemia, neither of which were present in this study. The vasopressor agents used in this study have complex neural, hormonal, and direct cardiac effects.<sup>32,33</sup> As a result, their net effect on the global responses examined in this study is a result of many actions. Thus, the present study does not elucidate all potential mechanisms or sites at which magnesium may have an effect.

In conclusion,  $\text{MgSO}_4$  attenuated the hypertensive response to the  $\alpha_2$ -adrenergic agonist ST-91 but not the response to phenylephrine, angiotensin II, or AVP. Furthermore,  $\text{MgSO}_4$  significantly attenuated the increase in UVR during phenylephrine, ST-91, and angiotensin II infusions and the decrease in UBF during phenylephrine and angiotensin II but not AVP infusions.  $\text{MgSO}_4$  nearly significantly attenuated the decrease in UBF during ST-

91 infusion. Although caution must be used in extrapolating these data to humans, the present study suggests that  $\text{MgSO}_4$  antagonizes the effects of endogenous  $\alpha_2$ -adrenergic agonists on the systemic vasculature. In addition,  $\text{MgSO}_4$  seems to antagonize the effects of  $\alpha_1$ -adrenergic agonists,  $\alpha_2$ -adrenergic agonists, and angiotensin II on the uterine vasculature, resulting in some protection of UBF. This effect of  $\text{MgSO}_4$  on the uterine vasculature may help protect the fetus in situations of maternal stress.

The authors appreciate the invaluable research assistance of Shari A. Bleuer, B.S. and Craig S. DeBruyn. The supply of ST-91 was generously provided by Boehringer-Ingelheim (Ridgefield, CT).

## References

1. Benedetti TJ: Life-threatening complications of betamimetic therapy for preterm labor inhibition. *Clin Perinatol* 13:843-52, 1986
2. Chestnut DH, Thompson CS, McLaughlin GL, Weiner CP: Does the intravenous infusion of ritodrine or magnesium sulfate alter the hemodynamic response to hemorrhage in gravid ewes? *Am J Obstet Gynecol* 159:1467-73, 1988
3. Chestnut DH, Weiner CP, Thompson CS, DeBruyn CS: Does indomethacin alter the hemodynamic response to magnesium sulfate infusion and hemorrhage in gravid ewes? *Obstet Gynecol* 76:1076-82, 1990
4. Vincent RD, Chestnut DH, Sipes SL, Weiner CP, DeBruyn CS, Bleuer SA: Magnesium sulfate decreases maternal blood pressure but not uterine blood flow during epidural anesthesia in gravid ewes. *ANESTHESIOLOGY* 74:71-76, 1991
5. Artal R, Glatz TH, Lam R, Nathanielsz PW, Hobel CJ: The effect of acute maternal hemorrhage on the release of catecholamines in the pregnant ewe and the fetus. *Am J Obstet Gynecol* 135: 818, 1979
6. Engeland WC, Dempsher DP, Byrnes GJ, Presnell K, Gann DS: The adrenal medullary response to graded hemorrhage in awake dogs. *Endocrinology* 109:1539, 1981
7. Wang BC, Sundet WD, Hakumaki MOK, Goetz KL: Vasopressin and renin responses to hemorrhage in conscious, cardiac denervated dogs. *Am J Physiol* 245:H399-H405, 1983
8. Oliver JR, Korner PI, Woods RL, Zhu JL: Reflex release of vasopressin and renin in hemorrhage is enhanced by autonomic blockade. *Heart Circ Physiol* 27:H221-H228; 1990
9. Liard JF:  $V_1$  versus combined  $V_1$  and  $V_2$  vasopressin blockade after hemorrhage in conscious dogs. *Am J Physiol* 255:H1325-H1329, 1988
10. Lee MI, Todd HM, Bowe A: The effects of magnesium sulfate infusion on blood pressure and vascular responsiveness during pregnancy. *Am J Obstet Gynecol* 149:705-8, 1984
11. Elliott JP: Magnesium sulfate as a tocolytic agent. *Am J Obstet Gynecol* 147:277-84, 1983
12. Hollander DI, Nagey DA, Pupkin MJ: Magnesium sulfate and ritodrine hydrochloride: A randomized comparison. *Am J Obstet Gynecol* 156:631-7, 1987
13. Iseri LT, French JH: Magnesium: Nature's calcium blocker. *Am Heart J* 108:188-93, 1984
14. Dunnett J, Naylor WG: Calcium efflux from sarcoplasmic reticulum: Effects of calcium and magnesium. *J Mol Cell Cardiol* 10:487, 1978
15. Podolsky RJ, Costantin LL: Regulation by calcium of the contraction and relaxation of muscle fibers. *Fed Proc* 23:933, 1964



16. Potter JD, Robertson SP, Johnson JD: Magnesium and regulation of muscle contraction. *Fed Proc* 40:2653, 1981
17. Von Euler US, Lishajko F: Effects of  $Mg^{2+}$  and  $Ca^{2+}$  on noradrenaline release and uptake in adrenergic nerve granules in different media. *Acta Physiol Scand* 89:415-22, 1973
18. Weaver K, Merrell CL, Griffin G: Effect of magnesium on cocaine-induced, catecholamine-mediated platelet and vascular response in term pregnant ewes. *Am J Obstet Gynecol* 161:1331-7, 1989
19. Cohen L, Kitzes R: Magnesium sulfate in the treatment of variant angina. *Magnesium* 3:46-49, 1984
20. Westfall DP: Supersensitivity of smooth muscle, *Smooth Muscle*. Edited by Bulbring E, Brading AF, Jones AW, Tomita T. Austin, University of Texas Press, 1981, pp 285-309
21. Timmermans PBMWM, Mathy JM, Wilffert B, Kalkman HO, Thoolen MJMC, de Jonge A, Van Meel JCA, Van Zwieten PA: Differential effect of calcium entry blockers on alpha-1-adrenoceptor-mediated vasoconstriction in vivo. *Naunyn Schmiedeberg Arch Pharmacol* 324:239-45, 1983
22. Langer SZ, Hicks PE: Alpha-adrenoreceptor subtypes in blood vessels: Physiology and Pharmacology. *J Cardiovasc Pharmacol* 6:S547-556, 1984
23. Scriabine A, Sweet CS, Ludden CT, Stavorski JM, Wenger HC, Bohidar NR: Some cardiovascular effects of ST-91 and clonidine. *Eur J Pharmacol* 43:333-41, 1977
24. Van Zwieten PA, Timmermans PBMWM, Thoolen MJMC, Wilffert B, de Jonge A: Calcium dependency of vasoconstriction mediated by alpha-1- and alpha-2-adrenoceptors. *J Cardiovasc Pharmacol* 7:S113-120, 1985.
25. Van Meel JCA, de Jonge A, Kalkman HO, Wilffert B, Timmermans PBMWM, Van Zwieten PA: Vascular smooth muscle contraction initiated by postsynaptic alpha-2-adrenoreceptor activation is induced by an influx of extracellular calcium. *J Pharmacol* 69:205-8, 1981
26. Cocks TM, Angus JA: Endothelium-dependent relaxation of coronary arteries by noradrenaline and serotonin. *Nature* 305:627-30, 1983.
27. Egleme C, Godfraind T, Miller RC: Enhanced responsiveness of rat isolated aorta to clonidine after removal of endothelial cells. *Br J Pharmacol* 81:16-8, 1984
28. Lew MJ, Angus JA: Alpha-1- and alpha-2-adrenoceptor-mediated pressor responses: Are they differentiated by calcium antagonists or by functional antagonism? *J Cardiovasc Pharmacol* 7:401-8, 1985
29. Magness RR, Rosenfeld CR: Systemic and uterine responses to alpha-adrenergic stimulation in pregnant and nonpregnant ewes. *Am J Obstet Gynecol* 155:897-904, 1986
30. Isla M, Dyer DC: Characterization of  $\alpha$ -adrenoceptors in the late pregnant ovine uterine artery. *Eur J Pharmacol* 178:321-31, 1990
31. Peters J, Schlaghecke R, Thouet H, Arndt JO: Endogenous vasopressin supports blood pressure and prevents severe hypotension during epidural anesthesia in conscious dogs. *ANESTHESIOLOGY* 73:694-702, 1990
32. Ramsay DJ, Keil LC, Sharpe MC, Shinsako J: Angiotensin II infusion increases vasopressin, ACTH, and 11-hydroxycorticosteroid secretion. *Am J Physiol* 234:R66-R71, 1978
33. Abboud FM, Aylward PE, Floras JS, Gupta BN: Sensitization of aortic and cardiac baroreceptors by arginine vasopressin in mammals. *J Physiol (Lond)* 377:251-265, 1986
